# Supplementary material
Source: Springer Nature journal article supplement (https://www.springermedizin.de/resource/supplementary/13075_2009_2638_MOESM9_ESM.pdf/9692540)
Supplement: MOESM9 [file 9692540]

Table 1

Echo shifts from cartilage surface and cartilage-bone interface in shrinkage and swelling phase

|                          | Control<br>(n = 7) | Group I<br>(n = 7) | Group II<br>(n = 7) | <i>P</i> value |
|--------------------------|--------------------|--------------------|---------------------|----------------|
| <b>Shrinkage phase</b>   |                    |                    |                     |                |
| Cartilage surface        | -92.9 ± 18.7 ns    | -80.6 ± 22.5 ns    | -79.0 ± 24.5 ns     | NS             |
| Cartilage-bone interface | -6.3 ± 16.1 ns     | 6.6 ± 18.1 ns      | 13.7 ± 7.0 ns       | NS             |
| <b>Swelling phase</b>    |                    |                    |                     |                |
| Cartilage surface        | -16.3 ± 20.6 ns    | -8.9 ± 11.2 ns     | -0.3 ± 7.1 ns       | NS             |
| Cartilage-bone interface | -88.3 ± 19.4 ns    | -74.0 ± 12.9 ns    | -73.0 ± 17.5 ns     | NS             |

Data are mean ± standard deviation. *P* value based on Kruskal-Wallis test. The significance level was set at  $P < 0.05$ . NS, not significant.
